# Supplementary material for: Applying Artificial Neural Networks to Oxidative Stress Biomarkers in Forager Honey Bees (Apis mellifera) for Ecological Assessment
Source: MDPI journal article supplement (doi:10.3390/toxics11080661), 2023-08-01
Supplement: s1 [file s1]

# Applying Artificial Neural Networks to Oxidative Stress Biomarkers in Forager Honey Bees (*Apis mellifera*) for Ecological Assessment

Gianandrea La Porta <sup>1,\*</sup>, Gabriele Magara <sup>1,†</sup>, Enzo Goretti <sup>1</sup>, Barbara Caldaroni <sup>1</sup>, Ambrosius Josef Martin Dörr <sup>1</sup>, Roberta Selvaggi <sup>1</sup>, Matteo Pallottini <sup>1</sup>, Tiziano Gardi <sup>2</sup>, Beniamino T. Cenci-Goga <sup>3</sup>, David Cappelletti <sup>1</sup> and Antonia Concetta Elia <sup>1,\*</sup>

**Table S2.** Correlation coefficients (r) between oxidative stress biomarkers and environmental variables.

| var1 | var2        | r      | p     |
|------|-------------|--------|-------|
| SOD  | land type   | 0.098  | 0.728 |
| SOD  | altitude    | -0.100 | 0.714 |
| SOD  | temperature | 0.450  | 0.091 |
| SOD  | rain        | -0.370 | 0.172 |
| SOD  | Cd          | 0.450  | 0.097 |
| SOD  | Pb          | -0.310 | 0.262 |
| SOD  | Zn          | 0.420  | 0.119 |
| SOD  | Cr          | 0.580  | 0.024 |
| SOD  | Ni          | -0.120 | 0.675 |
| SOD  | Cu          | 0.390  | 0.148 |
| SOD  | Mn          | 0.730  | 0.003 |
| SOD  | Fe          | 0.360  | 0.192 |
| CAT  | land type   | 0.450  | 0.094 |
| CAT  | altitude    | -0.140 | 0.611 |
| CAT  | temperature | 0.670  | 0.006 |
| CAT  | rain        | -0.280 | 0.314 |
| CAT  | Cd          | -0.089 | 0.751 |
| CAT  | Pb          | -0.300 | 0.283 |
| CAT  | Zn          | 0.600  | 0.021 |
| CAT  | Cr          | 0.450  | 0.093 |
| CAT  | Ni          | -0.036 | 0.899 |
| CAT  | Cu          | 0.046  | 0.873 |
| CAT  | Mn          | 0.760  | 0.001 |
| CAT  | Fe          | 0.600  | 0.021 |
| GPx  | land type   | 0.110  | 0.703 |
| GPx  | altitude    | -0.021 | 0.944 |
| GPx  | temperature | 0.230  | 0.403 |
| GPx  | rain        | -0.020 | 0.945 |
| GPx  | Cd          | 0.079  | 0.781 |
| GPx  | Pb          | -0.360 | 0.184 |

|      |             |        |       |
|------|-------------|--------|-------|
| GPx  | Zn          | -0.120 | 0.676 |
| GPx  | Cr          | -0.032 | 0.909 |
| GPx  | Ni          | -0.310 | 0.264 |
| GPx  | Cu          | -0.200 | 0.466 |
| GPx  | Mn          | 0.140  | 0.611 |
| GPx  | Fe          | -0.075 | 0.793 |
| GST  | land type   | 0.140  | 0.617 |
| GST  | altitude    | -0.014 | 0.964 |
| GST  | temperature | 0.540  | 0.036 |
| GST  | rain        | -0.450 | 0.096 |
| GST  | Cd          | 0.077  | 0.785 |
| GST  | Pb          | -0.260 | 0.351 |
| GST  | Zn          | 0.150  | 0.602 |
| GST  | Cr          | 0.670  | 0.006 |
| GST  | Ni          | 0.460  | 0.085 |
| GST  | Cu          | 0.270  | 0.320 |
| GST  | Mn          | 0.410  | 0.130 |
| GST  | Fe          | 0.530  | 0.044 |
| GR   | land type   | 0.250  | 0.361 |
| GR   | altitude    | -0.390 | 0.152 |
| GR   | temperature | -0.260 | 0.353 |
| GR   | rain        | 0.190  | 0.507 |
| GR   | Cd          | 0.190  | 0.507 |
| GR   | Pb          | 0.310  | 0.262 |
| GR   | Zn          | 0.120  | 0.667 |
| GR   | Cr          | -0.039 | 0.889 |
| GR   | Ni          | -0.640 | 0.011 |
| GR   | Cu          | -0.460 | 0.086 |
| GR   | Mn          | -0.260 | 0.354 |
| GR   | Fe          | -0.580 | 0.025 |
| AChE | land type   | 0.020  | 0.943 |
| AChE | altitude    | -0.270 | 0.327 |
| AChE | temperature | -0.300 | 0.276 |
| AChE | rain        | 0.047  | 0.869 |
| AChE | Cd          | 0.410  | 0.130 |
| AChE | Pb          | -0.270 | 0.337 |
| AChE | Zn          | -0.340 | 0.216 |
| AChE | Cr          | -0.130 | 0.642 |
| AChE | Ni          | -0.025 | 0.929 |
| AChE | Cu          | 0.064  | 0.822 |
| AChE | Mn          | -0.250 | 0.375 |
| AChE | Fe          | -0.270 | 0.320 |
