# Supplementary material for: Applying Artificial Neural Networks to Oxidative Stress Biomarkers in Forager Honey Bees (Apis mellifera) for Ecological Assessment
Source: MDPI journal article supplement (doi:10.3390/toxics11080661), 2023-08-01
Supplement: s1 [file s1]

# Applying Artificial Neural Networks to Oxidative Stress Biomarkers in Forager Honey Bees (*Apis mellifera*) for Ecological Assessment

Gianandrea La Porta <sup>1,\*</sup>, Gabriele Magara <sup>1,†</sup>, Enzo Goretti <sup>1</sup>, Barbara Caldaroni <sup>1</sup>, Ambrosius Josef Martin Dörr <sup>1</sup>, Roberta Selvaggi <sup>1</sup>, Matteo Pallottini <sup>1</sup>, Tiziano Gardi <sup>2</sup>, Beniamino T. Cenci-Goga <sup>3</sup>, David Cappelletti <sup>1</sup> and Antonia Concetta Elia <sup>1,\*</sup>

**Table S1.** Moran's I autocorrelation coefficients for environmental matrix.

| variable        | spatial autocorrelation | p.value |
|-----------------|-------------------------|---------|
| land type       | -0.067                  | 0.064   |
| altitude        | -0.158                  | >0.001  |
| air temperature | -0.246                  | >0.001  |
| total rainfall  | -0.151                  | >0.001  |
| Zn              | -0.075                  | 0.024   |
| Cr              | -0.178                  | >0.001  |
| Cu              | -0.081                  | 0.011   |
| Mn              | -0.103                  | >0.001  |
| Fe              | -0.108                  | >0.001  |
| Cd              | -0.042                  | 0.472   |
| Pb              | -0.020                  | 0.618   |
| Ni              | -0.044                  | 0.481   |
